# Supplementary figures and images for: Prophylactic cranial irradiation in resected small cell lung cancer: A systematic review with meta-analysis
Source: PubMed Central journal article supplement — J Cancer. 2018 Jan 1;9(2):433–9. doi: 10.7150/jca.21465 (PMC5771351; doi:10.7150/jca.21465), 2018-01-01

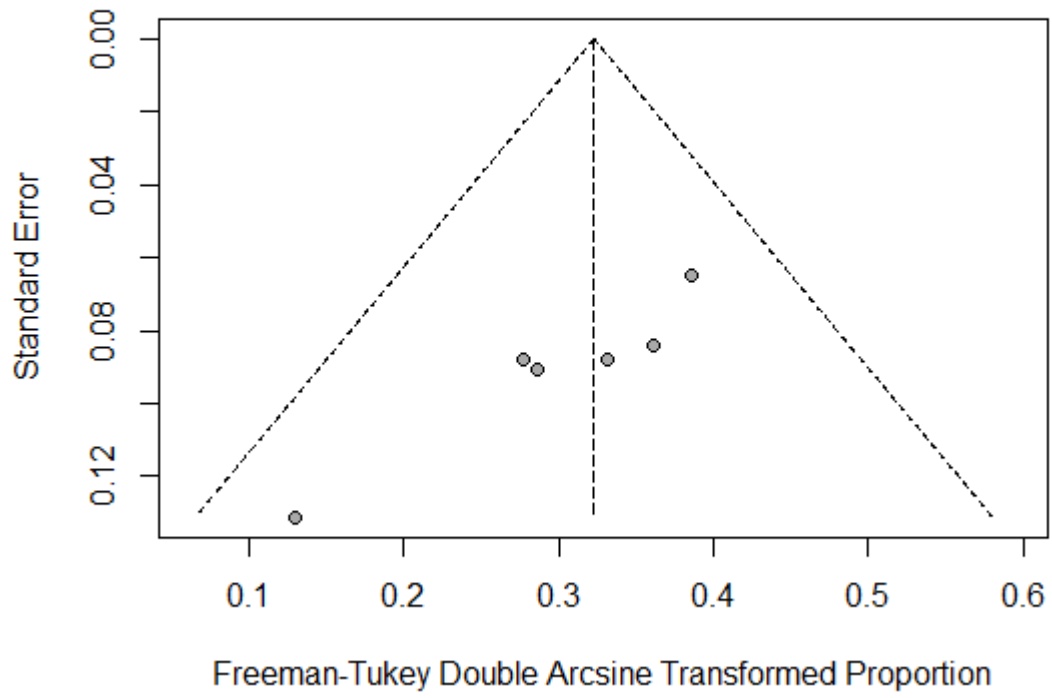

Supplement: jcav09p0433s1.pdf [file jcav09p0433s1.pdf]
